# Supplementary material for: Fusobacterium Genomics Using MinION and Illumina Sequencing Enables Genome Completion and Correction
Source: PubMed Central journal article supplement (PMC6034080; doi:10.1128/msphere.00269-18), 2018-07-05
Supplement: sph004182585st1.pdf [file sph004182585st1.pdf]

| Species                  | Strain  | # Illumina Sequences | Base Pairs | Mean Length | Max Length | Genome Size                     | Mean Depth |
|--------------------------|---------|----------------------|------------|-------------|------------|---------------------------------|------------|
| <i>F. nucleatum</i>      | 23726   | 5,163,442            | 774.5 mb   | 150.2       | 151        | 2,299,539                       | 336 X      |
| <i>F. nucleatum</i>      | 25586   | 1,250,000            | 187.5 mb   | 150.0       | 150        | 2,180,101                       | 86.0 X     |
| <i>F. varium</i>         | 27725   | 1,250,000            | 187.5 mb   | 150.2       | 151        | 3,303,644<br>Plasmid:<br>42,814 | 56.8 X     |
| <i>F. ulcerans</i>       | 49185   | 1,250,000            | 187.5 mb   | 150.2       | 151        | 3,537,675                       | 53.1 X     |
| <i>F. mortiferum</i>     | 9817    | 1,250,000            | 187.5 mb   | 150.2       | 151        | 2,716,766                       | 69.2 X     |
| <i>F. gonidiaformans</i> | 25563   | 1,250,000            | 187.5 mb   | 150.2       | 151        | 1,678,881                       | 111 X      |
| <i>F. periodonticum</i>  | 2_1_31  | 1,250,000            | 187.5 mb   | 150.2       | 151        | 2,541,084                       | 73.8 X     |
| <i>F. necrophorum</i>    | 1_1_36S | 1,250,000            | 187.5 mb   | 150.2       | 151        | 2,286,018                       | 82.2 X     |
