# Supplementary material for: Fusobacterium Genomics Using MinION and Illumina Sequencing Enables Genome Completion and Correction
Source: PubMed Central journal article supplement (PMC6034080; doi:10.1128/msphere.00269-18), 2018-07-05
Supplement: sph004182585st2.pdf [file sph004182585st2.pdf]

| Sample IDs                                                    | Sequencing Kit            | Flow Cell                   | MinKNOW Version | Input DNA (µg)                       |
|---------------------------------------------------------------|---------------------------|-----------------------------|-----------------|--------------------------------------|
| 23726                                                         | SQK-LSK108                | FLO-MIN106<br>(SpotON) R9.4 | 1.7.10          | 2.38                                 |
| 25586                                                         | SQK-LSK108                | FLO-MIN107<br>(SpotON) R9.5 | 1.7.14          | 3.96                                 |
| 49185, 9817, 25563,<br>2_1_31, 1_1_36S,<br>27725 <sup>#</sup> | SQK-LSK108,<br>EXP-NBD103 | FLO-MIN107<br>(SpotON) R9.5 | 1.7.14          | 3.72, 3.12, 2.94, 0.6,<br>2.31, 1.83 |

<sup>#</sup>Multi-plexed on one flow cell.s
