# Supplementary material for: Fusobacterium Genomics Using MinION and Illumina Sequencing Enables Genome Completion and Correction
Source: PubMed Central journal article supplement (PMC6034080; doi:10.1128/msphere.00269-18), 2018-07-05
Supplement: sph004182585st3.pdf [file sph004182585st3.pdf]

| Species                  | Strain  | # MinION Sequences | Base Pairs  | Mean Length | Max Length | Genome Size                     | Mean Depth |
|--------------------------|---------|--------------------|-------------|-------------|------------|---------------------------------|------------|
| <i>F. nucleatum</i>      | 23726   | 13,904             | 81,303,330  | 5,847.5     | 55,886     | 2,299,539                       | 35.4 X     |
| <i>F. nucleatum</i>      | 25586   | 25,240             | 111,179,924 | 4,404.9     | 84,482     | 2,180,101                       | 60.0 X     |
| <i>F. varium</i>         | 27725   | 31,066             | 89,376,121  | 2,877.0     | 62,500     | 3,303,644<br>Plasmid:<br>42,814 | 27.0 X     |
| <i>F. ulcerans</i>       | 49185   | 20,313             | 42,439,006  | 2,089.3     | 74,841     | 3,537,675                       | 12.0 X     |
| <i>F. mortiferum</i>     | 9817    | 37,658             | 118,090,402 | 3,135.9     | 83,201     | 2,716,766                       | 43.5 X     |
| <i>F. gonidiaformans</i> | 25563   | 58,596             | 105,220,409 | 1,784.7     | 87,683     | 1,678,881                       | 62.7 X     |
| <i>F. periodonticum</i>  | 2_1_31  | 52,316             | 178,049,514 | 3,403.3     | 68,386     | 2,541,084                       | 70.0 X     |
| <i>F. necrophorum</i>    | 1_1_36S | 66,335             | 129,875,928 | 1957.9      | 81,384     | 2,286,018                       | 56.8 X     |
